# Supplementary material for: Chronic Exposure to Uranium from Gestation: Effects on Behavior and Neurogenesis in Adulthood
Source: MDPI journal article supplement (doi:10.3390/ijerph14050536), 2017-05-17

**Figure S1.** Cell proliferation in 2-month-old control rats and rats exposed to U from gestational day 1. Confocal images of BrdU/NeuN immunostaining in the dentate gyrus of control (**a**) and U (120 mg/L, **b**) exposed dams. In green: NeuN-positive cells; in red BrdU-positive cells (arrow) and in yellow BrdU/NeuN-positive cells (head of arrow). Scale bar 100  $\mu$ m.

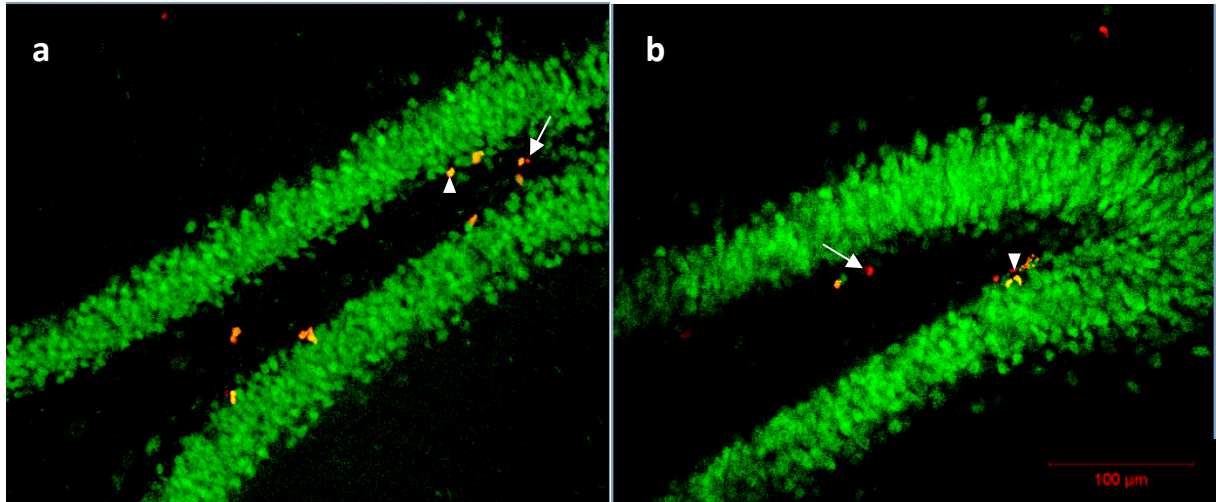

Supplement: s1 [file s1]
